# Supplementary material for: New Flavonolignan Glycosides from the Aerial Parts of Zizania latifolia
Source: Molecules. 2015 Mar 30;20(4):5616–24. doi: 10.3390/molecules20045616 (PMC6272199; doi:10.3390/molecules20045616)
Supplement: Supplementary file 1 [file molecules-20-05616-s001.pdf]

## Supporting Information

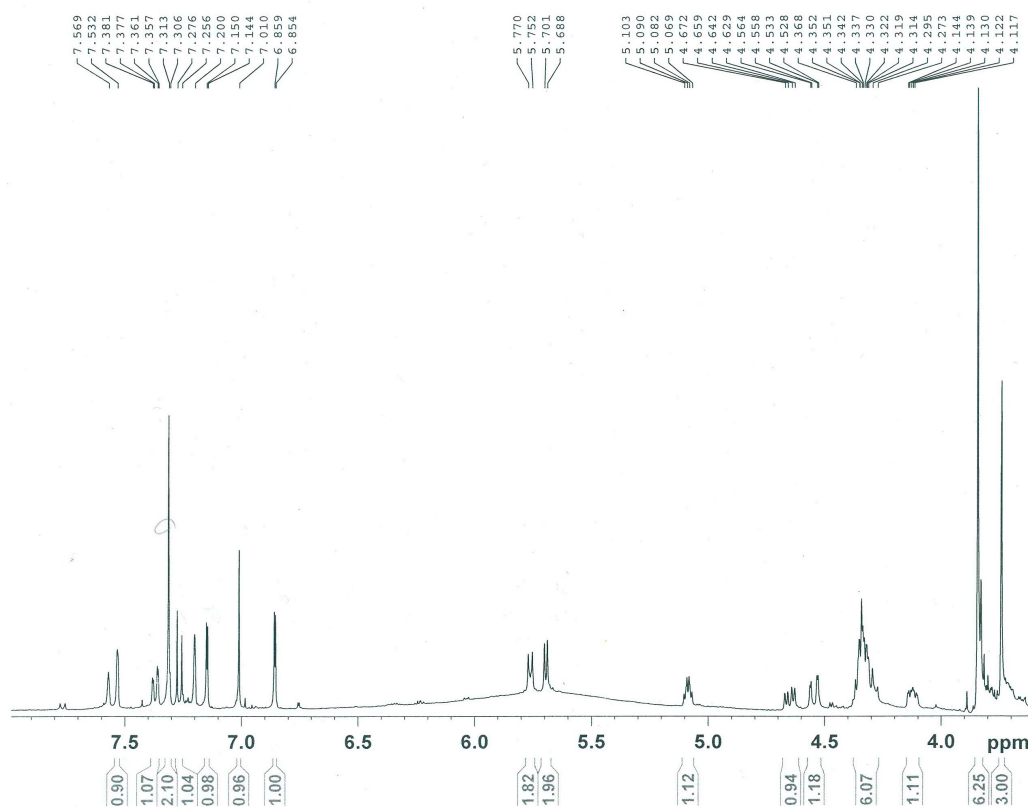

Figure S1. <sup>1</sup>H-NMR of compound 4.

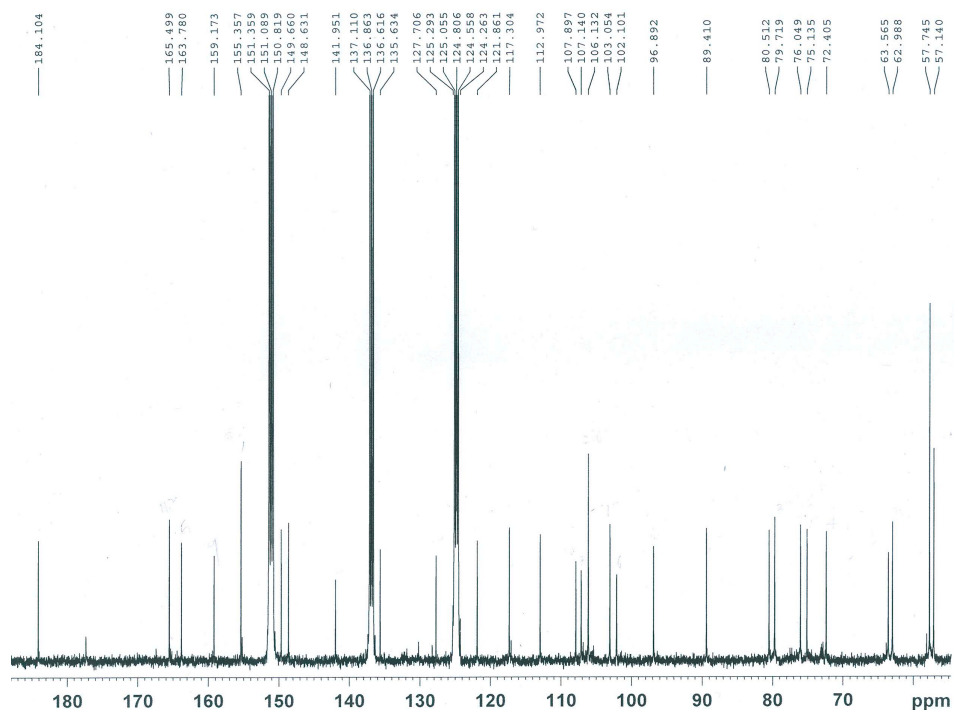

Figure S2. <sup>13</sup>C-NMR of compound 4.

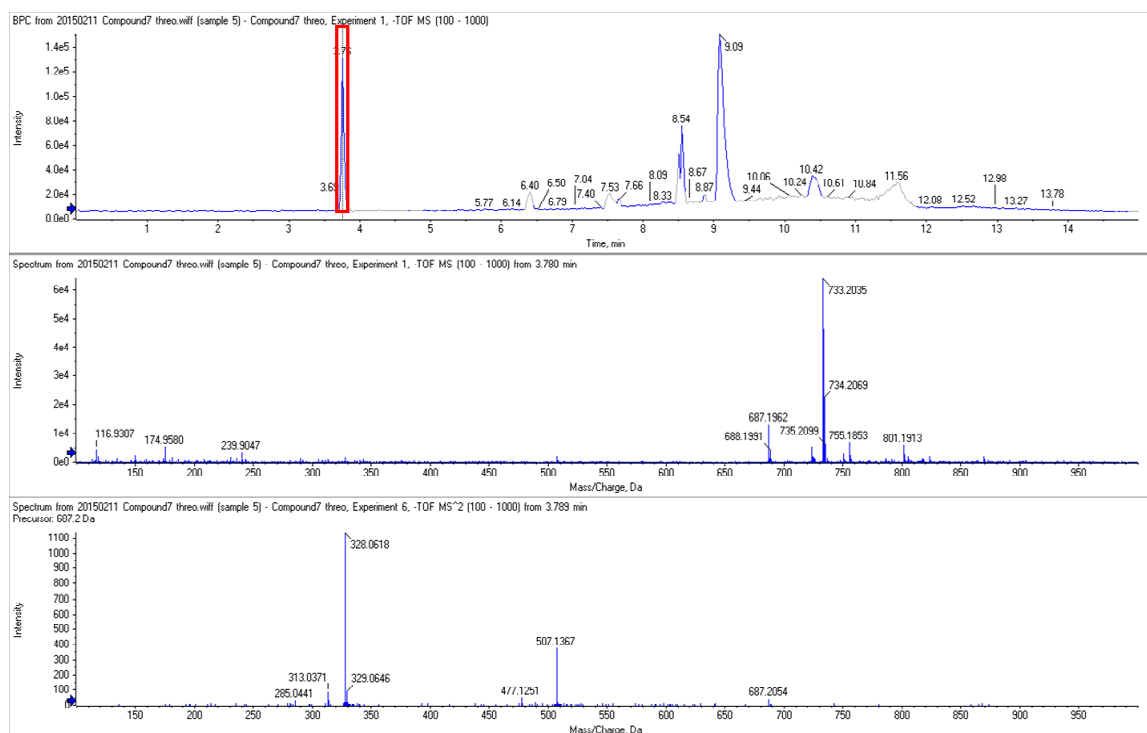

**Figure S3.** HR-ESIMS of compound **4**.

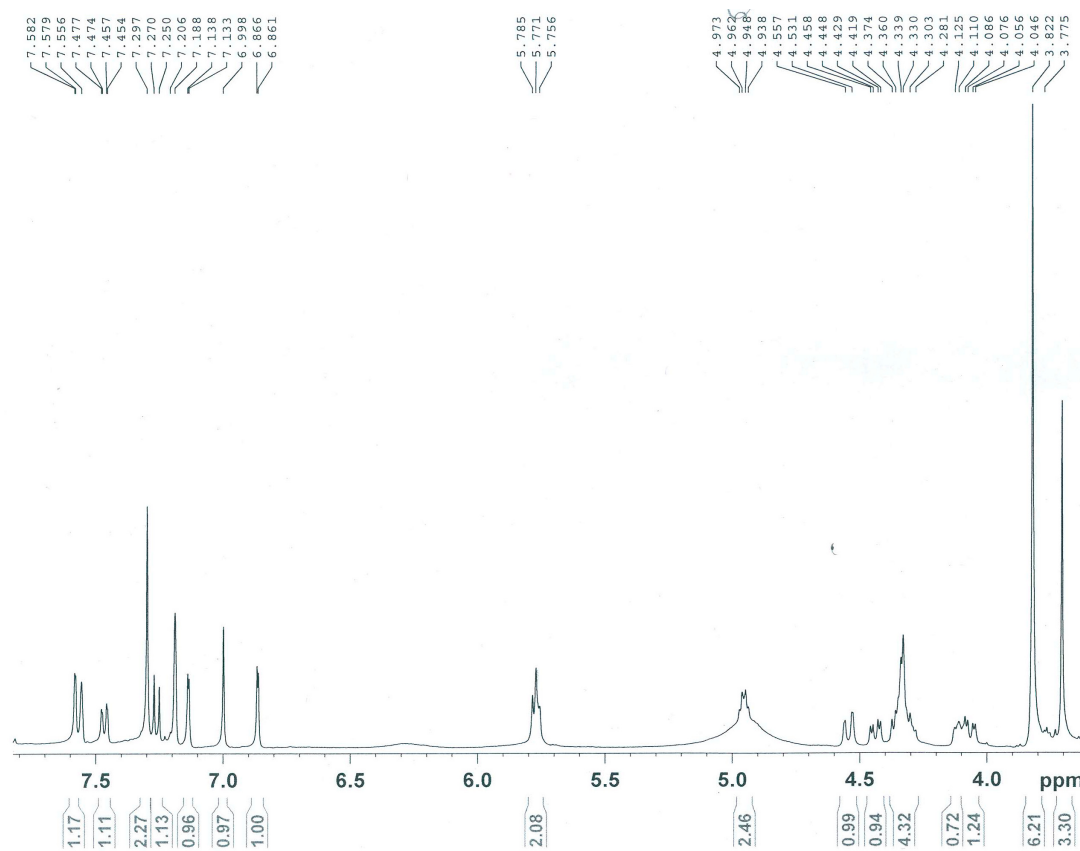

**Figure S4.**  $^1\text{H}$ -NMR of compound **5**.

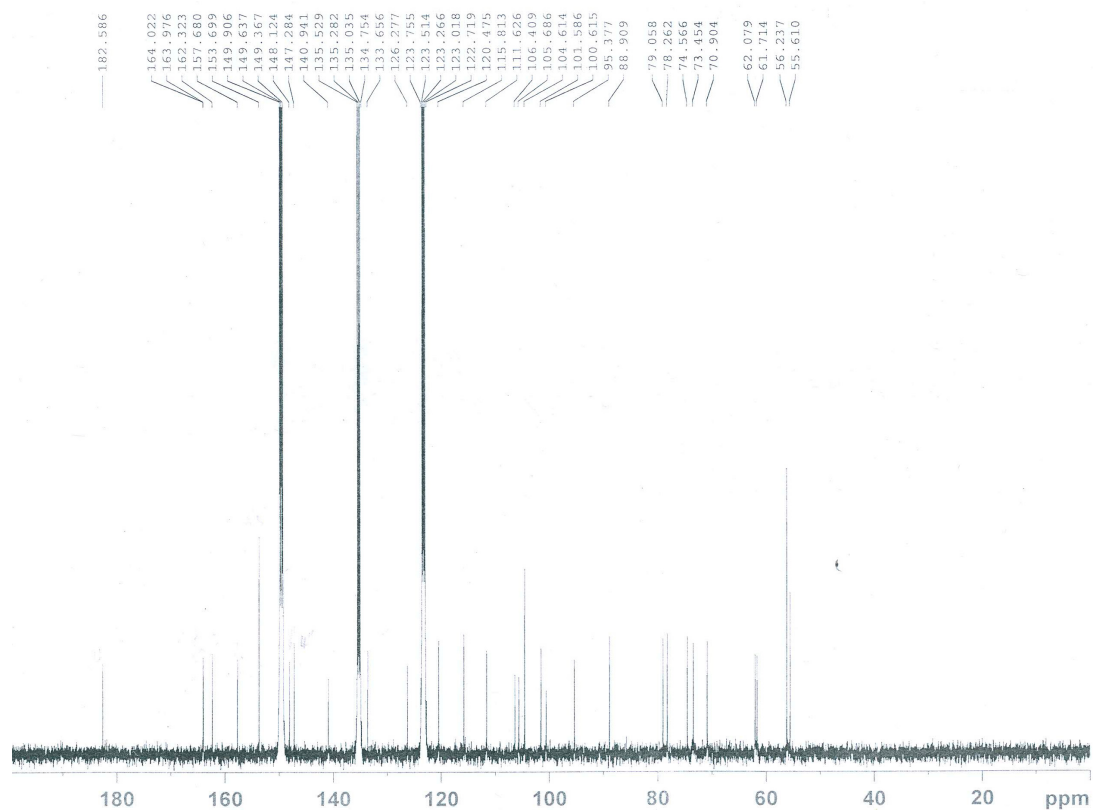

**Figure S5.**  $^{13}\text{C}$ -NMR of compound **5**.

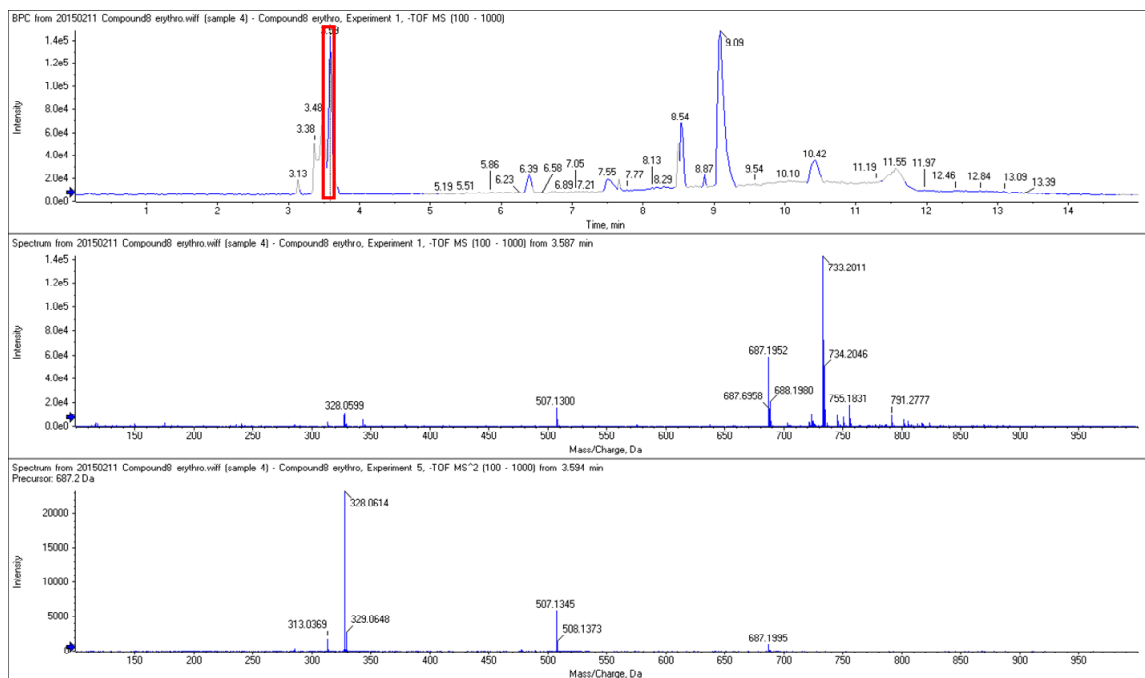

**Figure S6.** HR-ESIMS of compound **5**.
